# Supplementary material for: Porous, environment-friendly chitosan-ZIF composite fibers for dye adsorption
Source: Royal Society of Chemistry journal article supplement (doi:10.1039/d4ra06883a), 2024-01-01
Supplement: d4ra06883a1.pdf [file d4ra06883a1.pdf]

## Supporting information

### Porous environment friendly Chitosan-ZIFs composite fibers for dyes adsorption

Xuebin Hou<sup>a,b,c</sup>, Wei Chen<sup>a</sup>, Meihong Fan<sup>a,b,c</sup>, Chen Shi<sup>a\*</sup>

a. College of Textile Science and Engineering, Zhejiang Sci-Tech University, Hangzhou, Zhejiang  
Province 310018, PR China

b. Zhejiang Sci-Tech University Shengzhou Innovation Research Institute, Shaoxin, Zhejiang Province  
310018, PR China

c. Zhejiang Sci-Tech University Tongxiang Innovation Research Institute, Jiaxin, Zhejiang Province  
310018, PR China

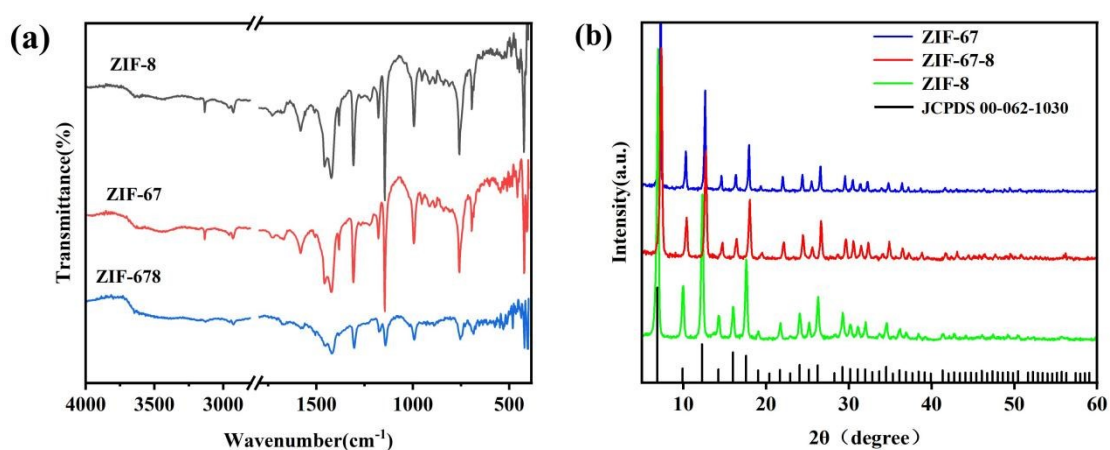

Figure S1 FTIR spectra and XRD patterns of ZIF-67, ZIF-8 and ZIF-67-8

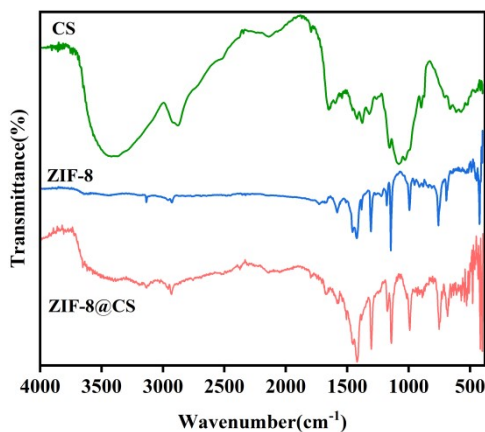

Figure S2 FTIR spectra of CS, ZIF-8 and ZIF-8@CS

**(a)** Average particle size: 53.45nm

$Zn^{2+}:2\text{-Methylimidazole}=1:2$

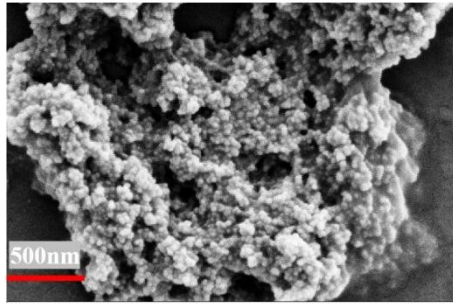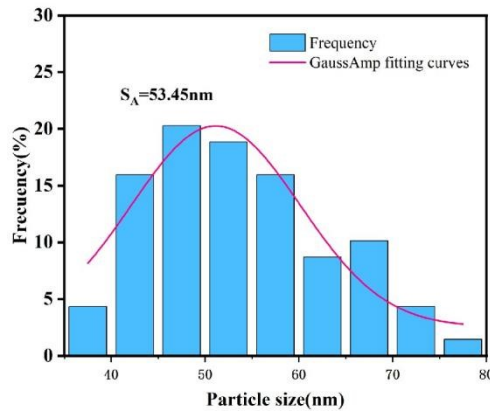

**(b)** Average particle size: 194.38nm

$Zn^{2+}:2\text{-Methylimidazole}=1:4$

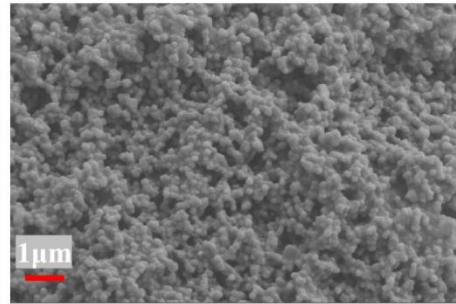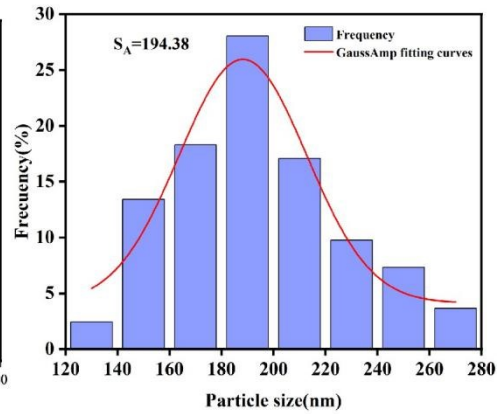

**(c)** Average particle size: 970.44nm

$Zn^{2+}:2\text{-Methylimidazole}=1:6$

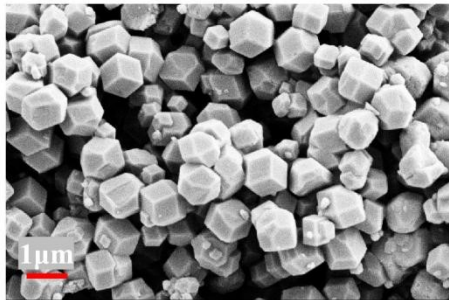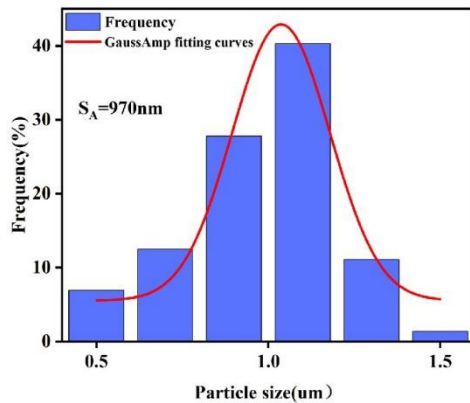

**(d)** Average particle size: 208.78nm

$Zn^{2+}:2\text{-Methylimidazole}=1:8$

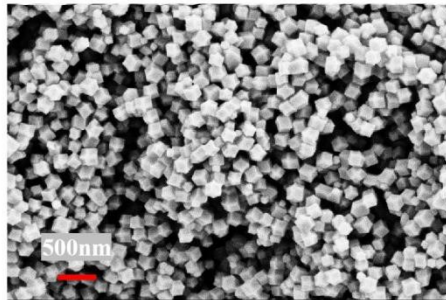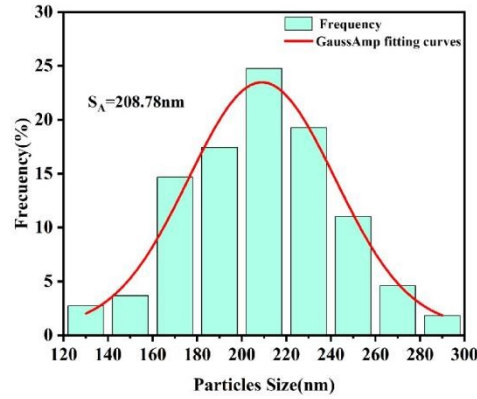

Figure S3 Comparison of the particle size of ZIF-8 nanomaterials prepared by different ligand ratio systems

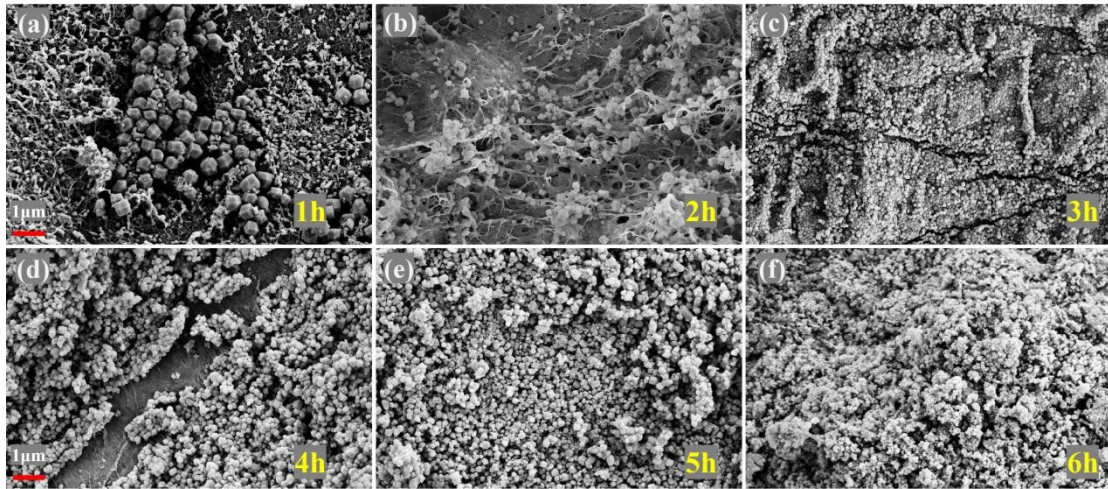

Figure S4 SEM images of ZIF-8@CS composite fibers prepared by different reaction time

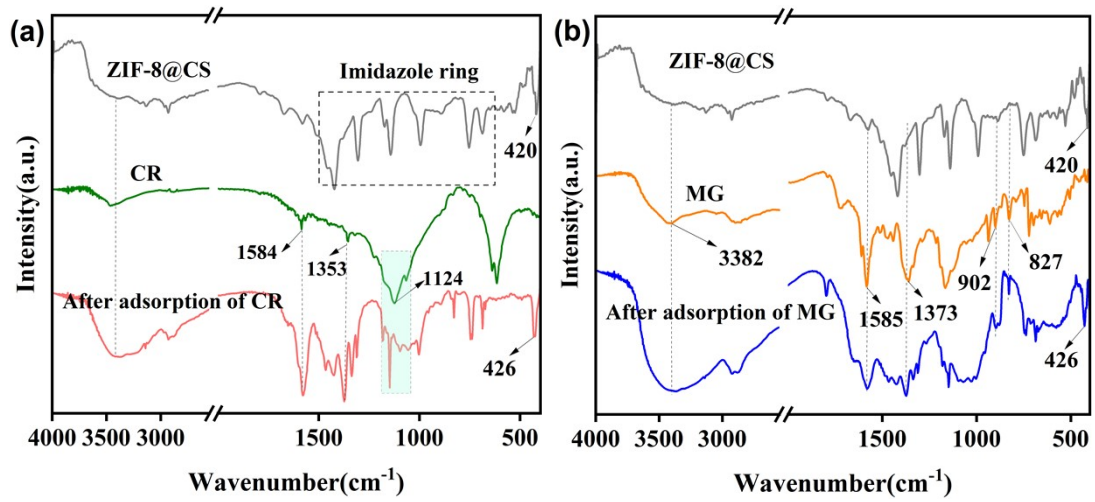

Figure S5 FTIR patterns of ZIF-8@CS before and after CR and MG adsorption

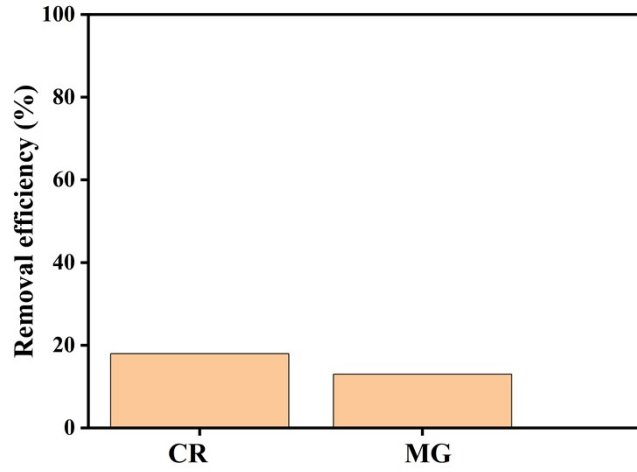

Figure S6 The adsorption of CS fibers for CR and MG

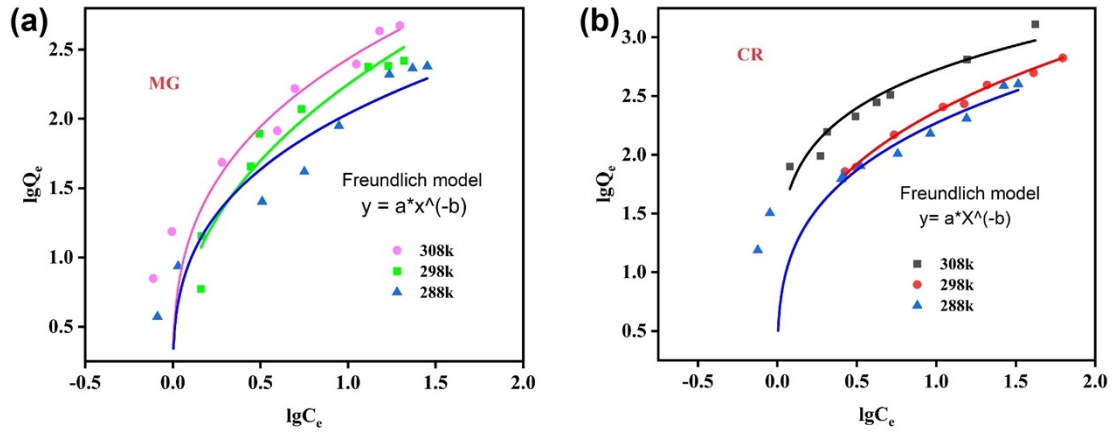

Figure S7. Non-linear Freundlich model fitting plots for MG and CR adsorption isotherm
